# Supplementary material for: Differential Effect of Vaginal Microbiota on Spontaneous Preterm Birth among Chinese Pregnant Women
Source: Hindawi journal article supplement (doi:10.1155/2022/3536108), 2022-01-01
Supplement: f1 [file 3536108.f1.pdf]

## Contents

|                                                                                        |   |
|----------------------------------------------------------------------------------------|---|
| Supplementary figures .....                                                            | 2 |
| Figure S1. The flowchart for the process of pregnant women enrolled in this study..... | 2 |
| Figure S2. Vaginal bacterial composition in the sPTB and controls.....                 | 3 |
| Supplementary tables .....                                                             | 4 |
| TableS1 Interaction of GDM and vaginal taxa on sPTB.....                               | 4 |

## Supplementary figures

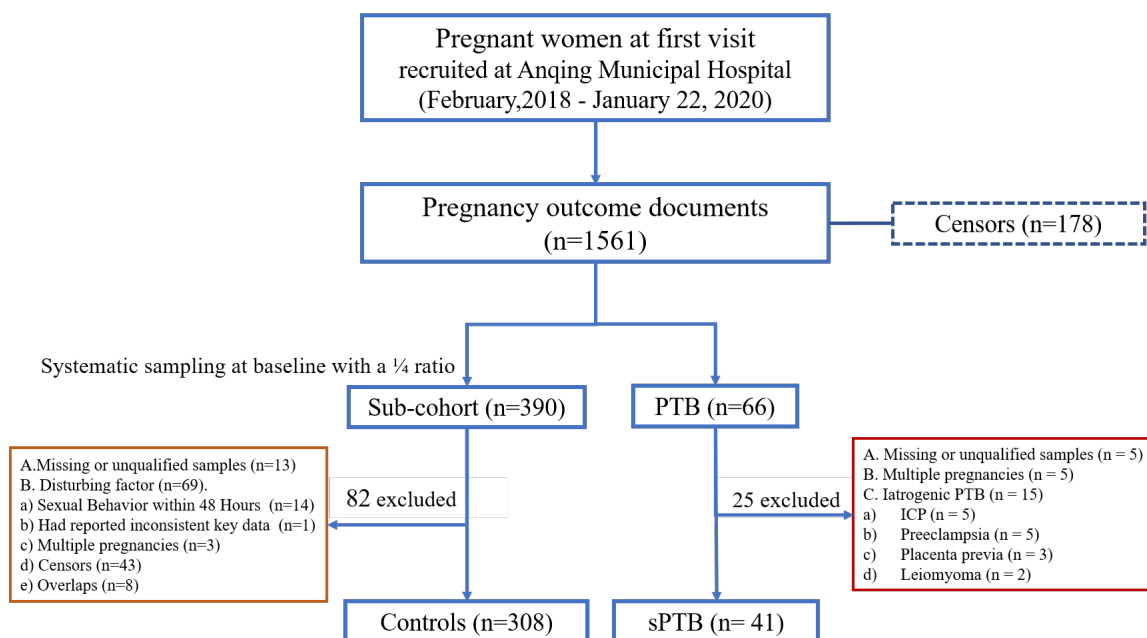

**Figure S1. The flowchart for the process of pregnant women enrolled in this study. PTB, preterm birth; sPTB, spontaneous preterm birth; ICP, intrahepatic cholestasis of pregnancy.**

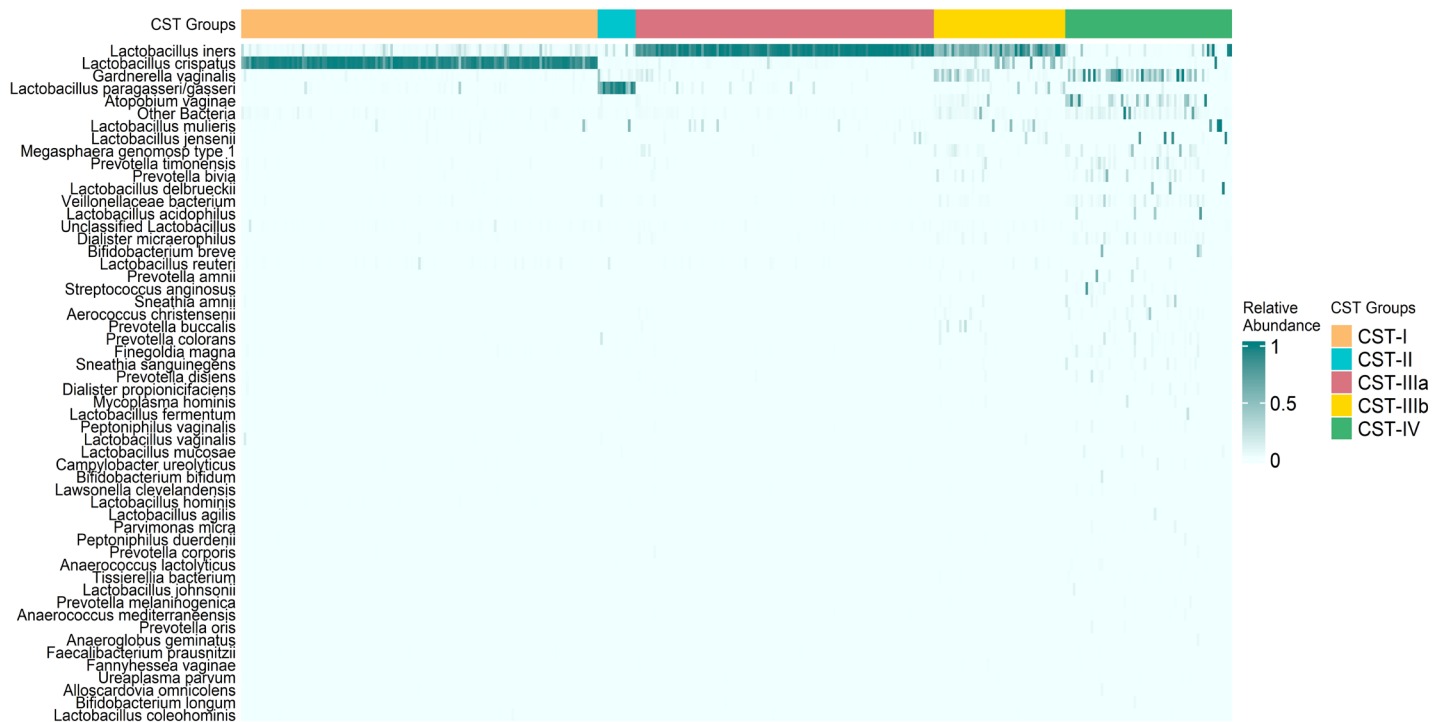

**Figure S2. Vaginal bacterial composition in the sPTB and controls.** The composition of vaginal microbiota among CSTs were exhibited at species level, and different CSTs annotated with distinction colors were marked by the dominant species. CSTs, community state types; sPTB, spontaneous preterm birth.

## Supplementary tables

**Table S1 Interaction of GDM and vaginal taxa on sPTB.**

| Terms                                    | Multiplicative scale    |              |                  |
|------------------------------------------|-------------------------|--------------|------------------|
|                                          | aOR(95%CI) <sup>a</sup> | <i>P</i>     | FDR <sup>b</sup> |
| <i>g_Streptococcus</i> :GDM <sup>c</sup> | 0.29(0.04-2.19)         | 0.230        | 0.767            |
| <i>p_Proteobacteria</i> :GDM             | 0.15(0.02-0.99)         | <b>0.048</b> | 0.161            |
| <i>s_L.mulieris</i> :GDM                 | 1.10(0.18-6.84)         | 0.920        | 0.990            |
| <i>s_L.paragasseri/gasseri</i> :GDM      | 0.10(0.01-0.68)         | <b>0.019</b> | 0.062            |

<sup>a</sup>aOR, adjusted odds ratio of each interaction term in logistic model was adjusted for age, number of previous pregnancies, pre-pregnancy body mass index, passive smoking; CI, confidence interval. <sup>b</sup>FDR, False discovery rate. <sup>c</sup> GDM, gestational diabetes mellitus.
